# Supplementary material
Source: PubMed Central journal article supplement (PMC8375606)
Supplement: NIHMS1724673-supplement-003200_-_Supplemental_Material.pdf [file NIHMS1724673-supplement-003200_-_Supplemental_Material.pdf]

**SUPPLEMENTAL MATERIAL**

**Interpretation of incidental genetic findings localizing to genes associated with cardiac channelopathies and cardiomyopathies**

**Ezekian, JE, et al.**

**Supplemental Materials**

**Supplemental Table I:**

Summary of ACMG-identified clinically actionable/reportable genes

| <b>Disease</b>                                               | <b>Actionable/Reportable Genes*</b>                                                                                                                                                                                               |
|--------------------------------------------------------------|-----------------------------------------------------------------------------------------------------------------------------------------------------------------------------------------------------------------------------------|
| <b>Hypertrophic Cardiomyopathy</b>                           | <i>ACTC1</i> <sup>†</sup> , <i>GLA</i> , <i>MYBPC3</i> <sup>†</sup> , <i>MYH7</i> <sup>†</sup> , <i>MYL2</i> , <i>MYL3</i> , <i>PRKAG2</i> , <i>TNNI3</i> <sup>†</sup> , <i>TNNT2</i> <sup>†</sup> , and <i>TPM1</i> <sup>†</sup> |
| <b>Arrhythmogenic Right Ventricular Cardiomyopathy</b>       | <i>DSG2</i> , <i>DSP</i> , <i>DSC2</i> , <i>PKP2</i> , and <i>TMEM43</i>                                                                                                                                                          |
| <b>Dilated Cardiomyopathy</b>                                | <i>ACTC1</i> <sup>†</sup> , <i>LMNA</i> , <i>MYBPC3</i> <sup>†</sup> , <i>MYH7</i> <sup>†</sup> , <i>TNNI3</i> <sup>†</sup> , <i>TNNT2</i> <sup>†</sup> , and <i>TPM1</i> <sup>†</sup>                                            |
| <b>Catecholaminergic Polymorphic Ventricular Tachycardia</b> | <i>RYR2</i>                                                                                                                                                                                                                       |
| <b>Long QT Syndrome</b>                                      | <i>KCNQ1</i> , <i>KCNH2</i> , and <i>SCN5A</i> <sup>‡</sup>                                                                                                                                                                       |
| <b>Brugada Syndrome</b>                                      | <i>SCN5A</i> <sup>‡</sup>                                                                                                                                                                                                         |

\*Based on 2013 ACMG guidelines on reporting of incidental findings in exome and genome sequencing<sup>6-8</sup>. <sup>†</sup>Genes overlap between HCM and DCM disease phenotypes. <sup>‡</sup> Gene overlap between LQTS and BrS disease phenotypes.

**Supplemental Table II:**

Prevalence, frequency, and signal-to-noise ratios of variants associated with inherited cardiac channelopathies and cardiomyopathies.

| Disease                                               | Disease Prevalence | Variant/Variant Frequency |            |                 |                | Signal:Noise           |                             |                            | Incidental Variant Prevalence vs Disease Prevalence* |                            | Ref   |
|-------------------------------------------------------|--------------------|---------------------------|------------|-----------------|----------------|------------------------|-----------------------------|----------------------------|------------------------------------------------------|----------------------------|-------|
|                                                       |                    | Pathogenic                | Population | Incidental LP/P | Incidental VUS | Pathogenic: Population | Incidental LP/P: Population | Incidental VUS: Population | Incidental LP/P: Prevalence                          | Incidental VUS: Prevalence |       |
| Hypertrophic cardiomyopathy                           | 1 in 500           | 50%                       | 5%         | 0.5%            | 6.8%           | 10:1                   | 0.1:1                       | 0.41:1                     | 2.5-fold                                             | 34-fold                    | 24-28 |
| Arrhythmogenic right ventricular cardiomyopathy       | 1 in 5000          | 60%                       | 16%        | 0.4%            | 14%            | 3.8:1                  | 0.025:1                     | 0.0875:1                   | 20-fold                                              | 700-fold                   | 29-30 |
| Dilated cardiomyopathy                                | 1 in 2500          | 30%                       | 14%        | N/A             | N/A            | 2.14:1                 | N/A                         | N/A                        | N/A                                                  | N/A                        | 31-35 |
| Catecholaminergic polymorphic ventricular tachycardia | 1 in 10,000        | 47%                       | 6%         | 0.2%            | 9%             | 8.3:1                  | 0.033:1                     | 1.5:1                      | 20-fold                                              | 900-fold                   | 36-38 |
| Long QT syndrome                                      | 1 in 2000          | 75%                       | 10%        | 0.5%†<br>1.2%‡  | 11%†<br>37%‡   | 7.5:1                  | 0.05:1†<br>0.12:1‡          | 1.1:1†<br>3.7:1‡           | 10-fold†<br>24-fold‡                                 | 220-fold<br>740-fold‡      | 39-41 |
| Brugada syndrome                                      | 1 in 2,000         | 21%                       | 5%         | 0.3%            | 6.3%           | 4.2:1                  | 0.06:1                      | 1.26:1                     | 6-fold                                               | 126-fold                   | 40,42 |

Variant frequency for each disease is based on variant classification. Pathogenic percentage denotes individuals positive for a pathogenic variant in one of the genes associated with disease. Population variants are rare variants found in a large population cohort. LP/P, incidentally identified likely pathogenic and/or pathogenic variants. N/A, not available or not identified. \*Fold-difference between the prevalence of incidentally identified variants versus known disease prevalence in the community. Calculation based on presumption that all individuals with disease are genotype positive. †Only ACMG-designated actionable genes associated with LQTS (*KCNQ1*, *KCNH2*, and *SCN5A*), ‡All LQTS-associated genes
